# Supplementary material for: Knockdown of HPRT for Selection of Genetically Modified Human Hematopoietic Progenitor Cells
Source: PubMed Central journal article supplement (PMC3598703; doi:10.1371/journal.pone.0059594), 2013-03-15
Supplement: pone.0059594.s006.pdf [file pone.0059594.s006.pdf]

**Supplemental Table 1. shRNA constructs**

| <b>Construct Number</b> | <b>TRC Number</b> | <b>Sense strand sequence</b> |
|-------------------------|-------------------|------------------------------|
| 49                      | TRCN0000035049    | GCTATTGTAATGACCAGTCAA        |
| 50                      | TRCN0000035050    | CCAGGTTATGACCTTGATTTA        |
| 51                      | TRCN0000035051    | CCAGACTTTGTTGGATTTGAA        |
| 52                      | TRCN0000035052    | CTAATCATTATGCTGAGGATT        |
| 53                      | TRCN0000035053    | GTGTCATTAGTGAAACTGGAA        |
| 491                     | TRCN0000110491    | GCACTGAATAGAAATAGTGAT        |
| Non-silencing control   | SHC002            | CAACAAGATGAAGAGCACCAA        |
